# Supplementary material
Source: MDPI journal article supplement (https://www.mdpi.com/2073-4344/14/1/23)
Supplement: s1 [file s1]

# Rational Engineering of *Mesorhizobium* Imine Reductase for Improved Synthesis of *N*-Benzyl Cyclo-tertiary Amines

Zi-Han Zhang, An-Qi Wang, Bao-Di Ma and Yi Xu \*

School of Chemical and Environmental Engineering, Shanghai Institute of Technology,  
Shanghai 201418, China; 206061251@mail.sit.edu.cn (Z.-H.Z.); 226061271@mail.sit.edu.cn  
(A.-Q.W.); mbd2966@sit.edu.cn (B.-D.M.)

\* Correspondence: xuyi@sit.edu.cn; Tel.: +86-21-60873024

## Supporting Information

| Contents                                                                                                                                                                             | Page  |
|--------------------------------------------------------------------------------------------------------------------------------------------------------------------------------------|-------|
| <b>Figure S1.</b> SDS-PAGE assay of recombinant <i>Mes</i> IREDs and GDH.                                                                                                            | S2    |
| <b>Figure S2.</b> Enzyme activity determination of GDH, <i>Mes</i> IRED and <i>Mes</i> IRED's mutants.                                                                               | S2    |
| <b>Figure S3.</b> Effect of temperature on the conversion of benzyl alcohol (left) and <i>N</i> -benzylpyrrolidine (right) by whole cells of <i>E. coli</i> ( <i>Mes</i> IRED-GDH).  | S3    |
| <b>Figure S4.</b> Effect of temperature on the conversion of benzyl alcohol (left) and <i>N</i> -benzylpiperidine (right) by whole cells of <i>E. coli</i> ( <i>Mes</i> IRED-GDH).   | S3    |
| <b>Figure S5.</b> Effect of cell amounts on the conversion of benzyl alcohol (left) and <i>N</i> -benzylpyrrolidine (right) by whole cells of <i>E. coli</i> ( <i>Mes</i> IRED-GDH). | S3    |
| <b>Figure S6.</b> Effect of cell amounts on the conversion of benzyl alcohol (left) and <i>N</i> -benzylpiperidine (right) by whole cells of <i>E. coli</i> ( <i>Mes</i> IRED-GDH).  | S4    |
| <b>Figure S7.</b> The gas chromatograph of <i>N</i> -benzylpiperidine isolated from preparative-scale biotransformation.                                                             | S4    |
| <b>Figure S8.</b> NMR spectrums of <i>N</i> -benzylpiperidine isolated from preparative-scale biotransformation.                                                                     | S5    |
| <b>Table S1.</b> Conversions of benzyl alcohol and <i>N</i> -benzyl cyclo-tertiary amines by wild-type and single-site mutants of <i>Mes</i> IRED.                                   | S6    |
| <b>Table S2.</b> Primers for site-directed mutagenesis.                                                                                                                              | S7-S9 |

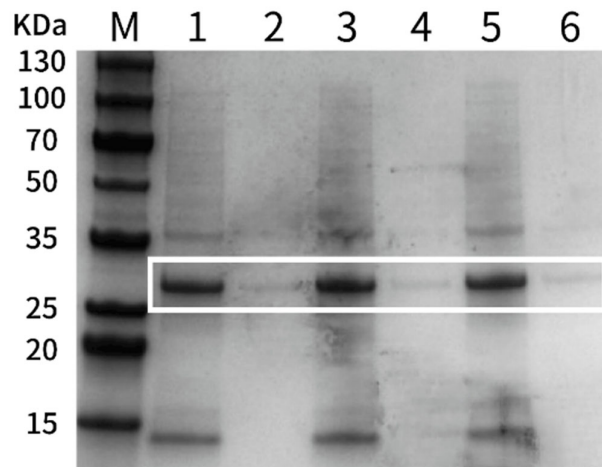

**Figure S1.** SDS-PAGE assay of recombinant *MesIREDs* and GDH. M: protein marker; 1: supernatant of cell extract from *E. coli* (*MesIRED*-GDH); 2: precipitation of cell extract from *E. coli* (*MesIRED*-GDH); 3: supernatant of cell extract from *E. coli* (*MesIRED*<sup>V212/I213V</sup>-GDH); 4: precipitation of cell extract from *E. coli* (*MesIRED*<sup>V212/I213V</sup>-GDH); 5: supernatant of cell extract from *E. coli* (*MesIRED*<sup>V212A/I177A/A241I</sup>-GDH); 6: precipitation of cell extract from *E. coli* (*MesIRED*<sup>V212A/I177A/A241I</sup>-GDH).

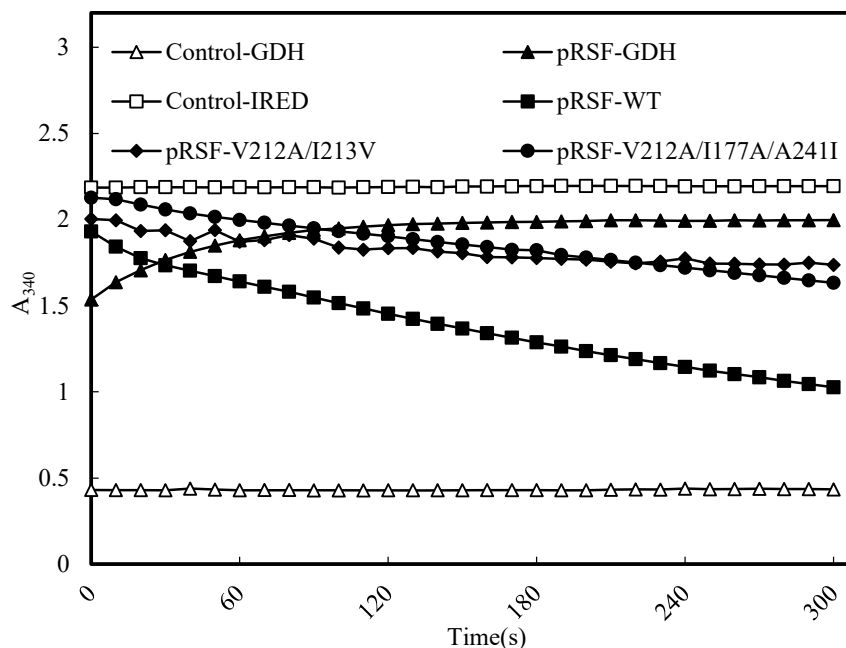

**Figure S2.** Enzyme activity determination of GDH, *MesIRED* and *MesIRED*'s mutants.  $A_{340}$  over time to NADPH or NADP<sup>+</sup> was measured with microplate reader. Conditions for IRED: 15 mM cyclohexanone, 60 mM methylamine, 100  $\mu$ L cell free lysate, 0.3 mM NADPH. Conditions for GDH: 200 mM glucose, 100  $\mu$ L cell free lysate, 0.3 mM NADP<sup>+</sup>. The control used buffer instead of substrate. Reactions were incubated at 25°C, 100 mM pH 9.0 Tris-HCl buffer.

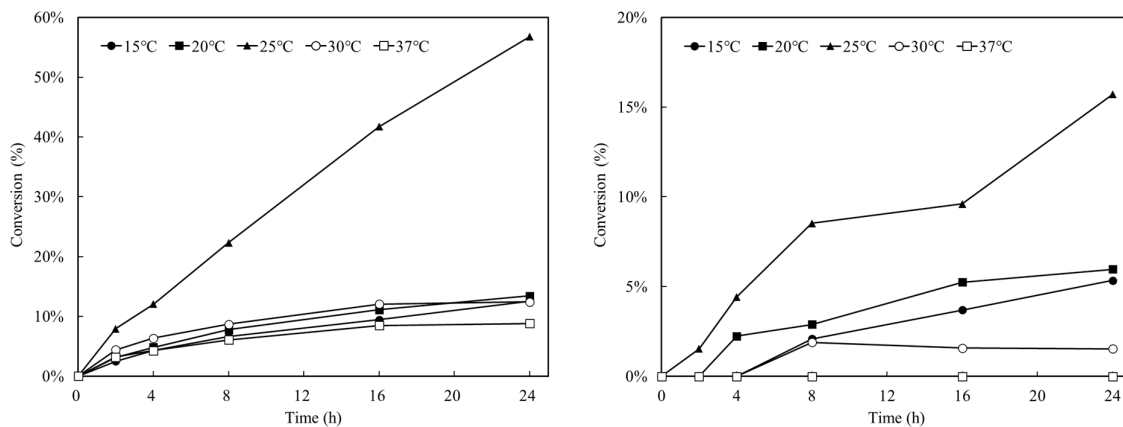

**Figure S3.** Effect of temperature on the conversion of benzyl alcohol (left) and *N*-benzylpyrrolidine (right) by whole cells of *E. coli* (*MesIRED-GDH*).

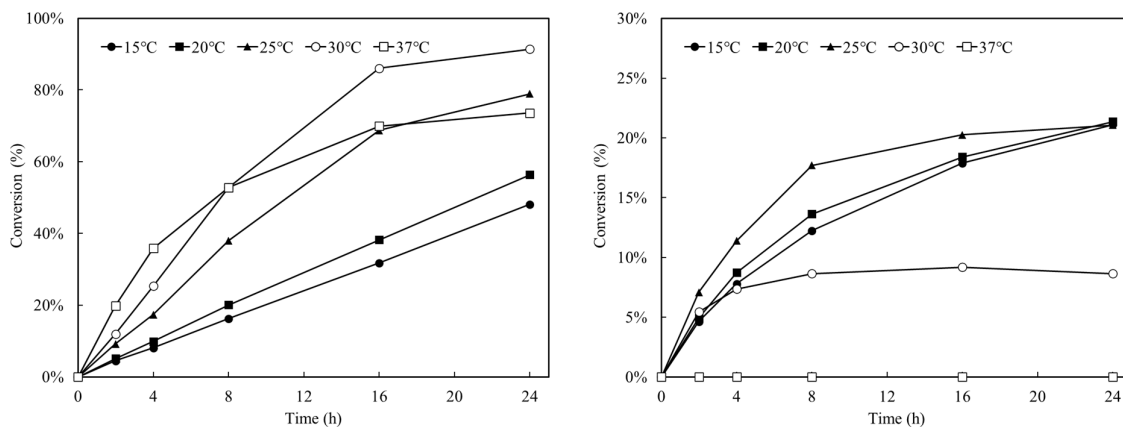

**Figure S4.** Effect of temperature on the conversion of benzyl alcohol (left) and *N*-benzylpiperidine (right) by whole cells of *E. coli* (*MesIRED-GDH*).

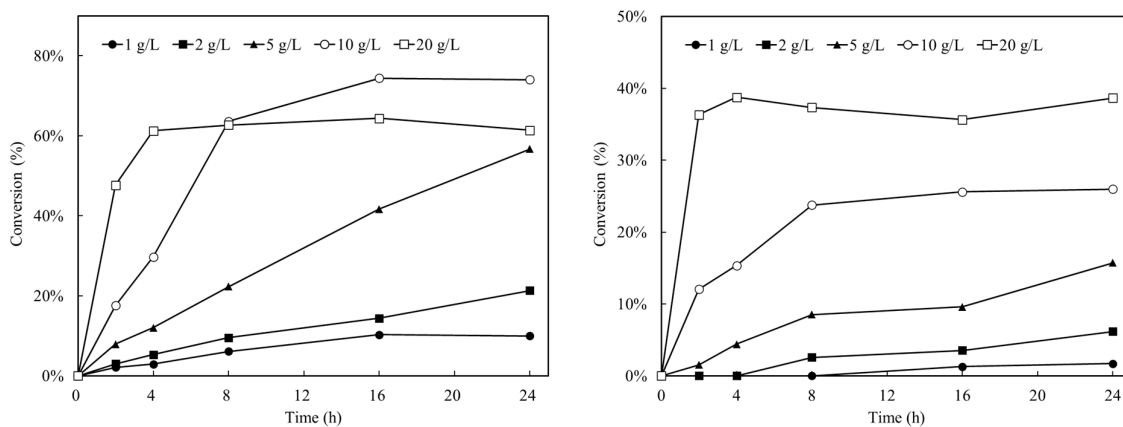

**Figure S5.** Effect of cell amounts on the conversion of benzyl alcohol (left) and *N*-benzylpyrrolidine (right) by whole cells of *E. coli* (*MesIRED-GDH*).

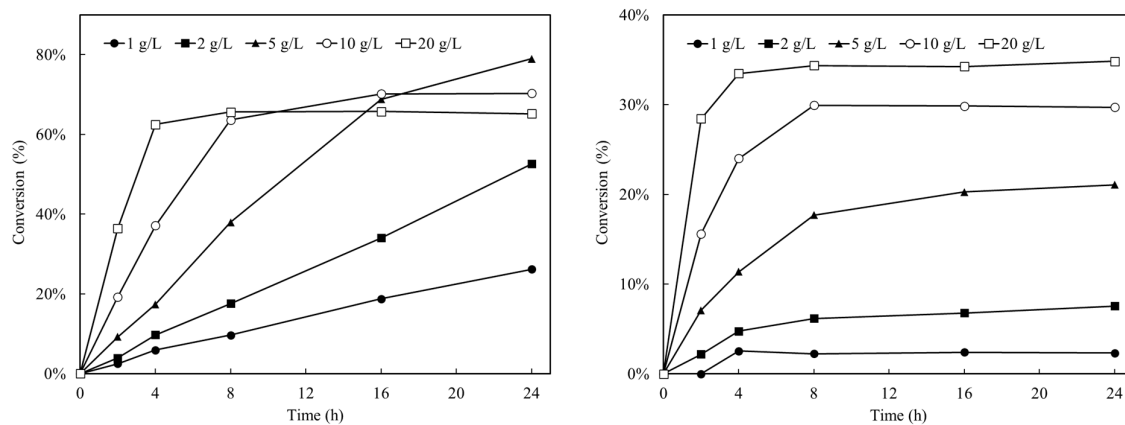

**Figure S6.** Effect of cell amounts on the conversion of benzyl alcohol (left) and *N*-benzylpiperidine (right) by whole cells of *E. coli* (*MesIRED-GDH*).

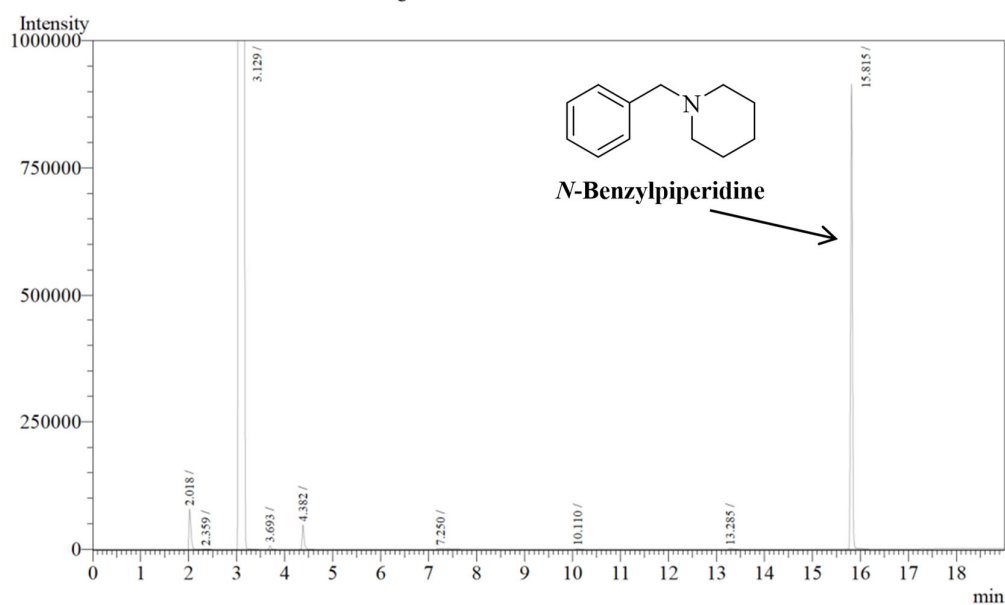

**Figure S7.** The gas chromatograph of *N*-benzylpiperidine isolated from preparative-scale biotransformation.

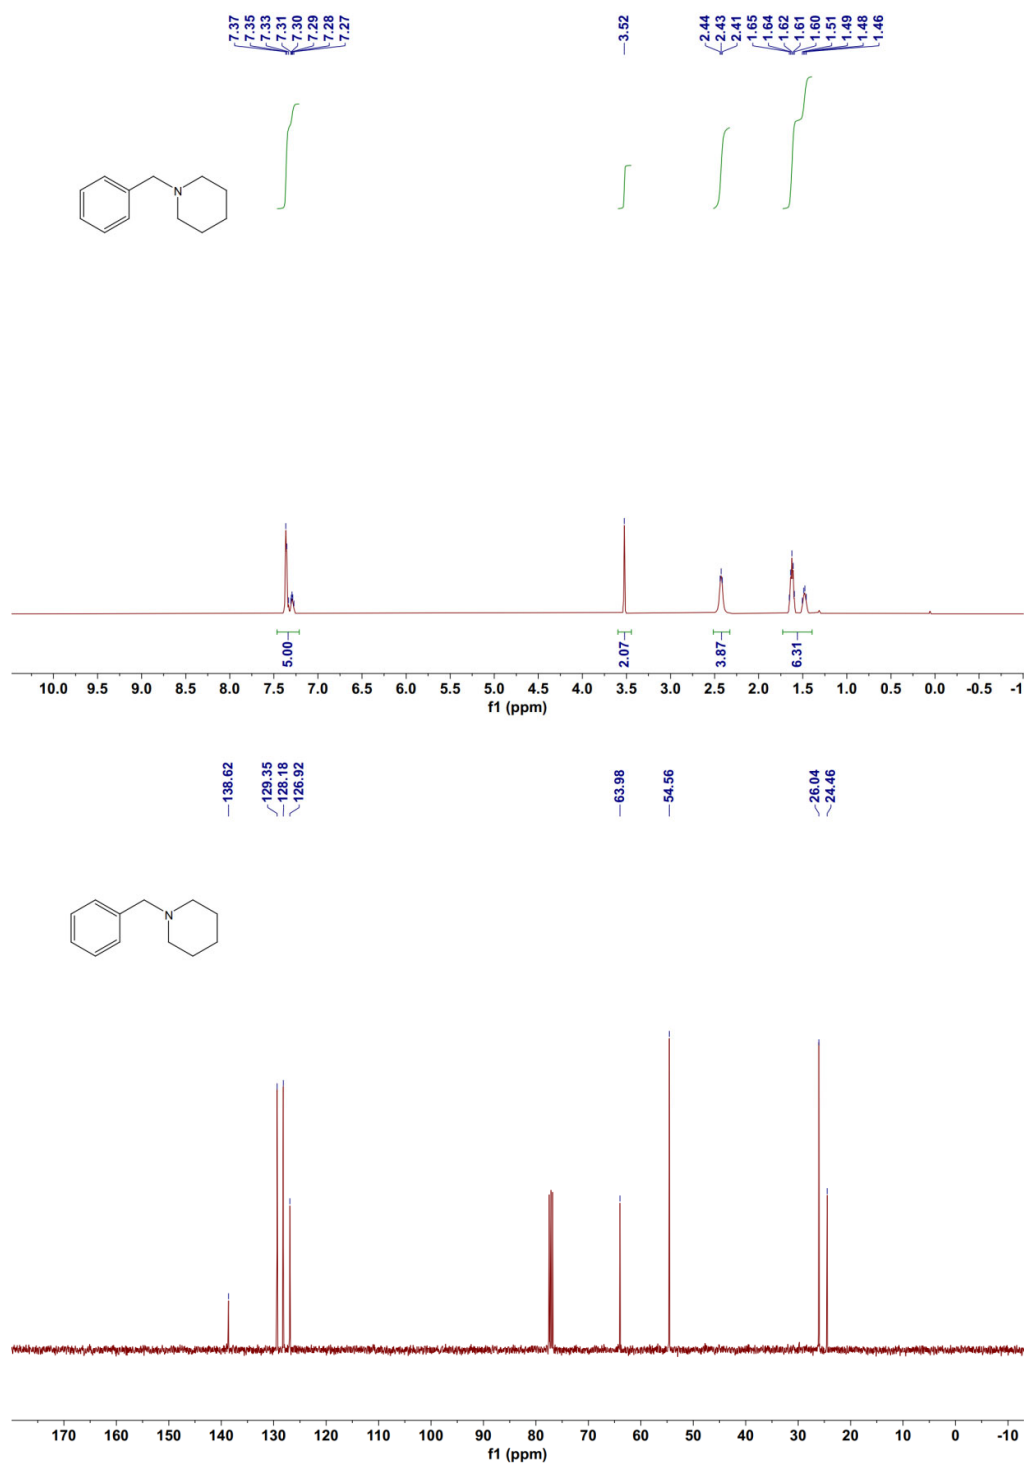

**Figure S8.** NMR spectra of *N*-benzylpiperidine isolated from preparative-scale biotransformation. <sup>1</sup>H NMR (400 MHz, CDCl<sub>3</sub>): δ 7.37-7.21 (m, 5H), 3.52 (s, 2H), 2.44-2.41 (m, 4H), 1.65-1.46 (m, 6H). <sup>13</sup>C NMR (100 MHz, CDCl<sub>3</sub>): δ 138.62, 129.35, 128.18, 126.92, 63.98, 54.56, 26.04, 24.46.

**Table S1.** Conversions of benzyl alcohol and *N*-benzyl cyclo-tertiary amines by wild-type and single-site mutants of *Mes*IRED.

$$1 + 2a-c \xrightarrow{\text{MesIRED}} 3 + 4a-c$$

$$\text{NADPH} \xrightarrow{\text{MesIRED}} \text{NADP}^+$$

$$\text{D-Gluconic acid} \xrightarrow{\text{GDH}} \text{D-Glucose}$$

$$n=0-1; X=\text{NH or CH}_2$$

| IREDs                         | Conversion (%) |            |            |            |           |
|-------------------------------|----------------|------------|------------|------------|-----------|
|                               |                |            |            |            |           |
|                               | 3              | 3, 4a      | 3, 4b      | 3, 4c      |           |
| WT                            | >99.9          | 76.3, 23.7 | 77.2, 22.8 | 3.1, 0.0   |           |
| Alanine Scanning              | M121A          | >99.9      | >99.9, 0.0 | 93.9, 0.0  | 0.0, 0.0  |
|                               | D171A          | >99.9      | >99.9, 0.0 | >99.9, 0.0 | 2.9, 0.0  |
|                               | L174A          | >99.9      | 69.1, 30.9 | 84.7, 15.3 | 0.5, 0.0  |
|                               | L175A          | >99.9      | >99.9, 0.0 | >99.9, 0.0 | 1.2, 0.0  |
|                               | I177A          | >99.9      | 43.2, 56.8 | 62.2, 37.8 | 1.3, 0.0  |
|                               | M178A          | >99.9      | 55.9, 44.1 | 60.8, 39.2 | 5.5, 0.0  |
|                               | T209A          | >99.9      | 58.5, 41.5 | 79.7, 20.3 | 3.2, 0.0  |
|                               | V212A          | >99.9      | 40.8, 59.2 | 54.7, 45.3 | 0.0, 0.0  |
|                               | I213A          | >99.9      | 53.1, 46.9 | 70.1, 29.9 | 2.4, 0.0  |
|                               | L216A          | >99.9      | 51.6, 48.4 | 86.4, 13.6 | 1.3, 0.0  |
| Conserved but Different Sites | I120M          | >99.9      | 88.9, 11.1 | 82.4, 17.6 | 15.3, 0.0 |
|                               | M121L          | >99.9      | 58.9, 41.1 | 77.6, 22.4 | 32.0, 0.0 |
|                               | L174V          | >99.9      | 71.6, 28.4 | 78.6, 21.4 | 19.9, 0.0 |
|                               | I177L          | >99.9      | 58.1, 41.9 | 75.5, 24.5 | 5.1, 0.0  |
|                               | I177V          | >99.9      | 65.6, 34.4 | 74.0, 26.0 | 0.0, 0.0  |
|                               | T209L          | >99.9      | 62.7, 37.3 | 51.5, 48.5 | 2.6, 0.0  |
|                               | I213V          | >99.9      | 60.2, 39.8 | 72.6, 27.4 | 1.9, 0.0  |
|                               | L216V          | >99.9      | 50.9, 49.1 | 69.1, 30.9 | 1.9, 0.0  |
|                               | A241T          | >99.9      | 65.2, 34.8 | 70.0, 30.0 | 16.6, 0.0 |
|                               | A241I          | >99.9      | 60.3, 39.7 | 63.1, 36.9 | 11.2, 0.0 |
|                               | A241P          | >99.9      | 60.8, 39.2 | 74.3, 25.7 | 6.1, 0.0  |
|                               | A241V          | >99.9      | 59.4, 40.6 | 80.8, 19.2 | 7.0, 0.0  |
|                               | A245S          | >99.9      | 83.0, 17.0 | 89.1, 10.9 | 0.0, 0.0  |

**Table S2.** Primers for site-directed mutagenesis.

| Primers | Sequences(5' to 3')                | GC/% | Tm/°C |
|---------|------------------------------------|------|-------|
| I120M-F | TTAGATGGTGCTATGATGGCAACCCCGGATT    | 48   | 62    |
| I120M-R | TATAATCCGGGGTTGCCATCATAGCACCAT     | 47   | 59    |
| M121L-F | TTAGATGGTGCTATCCTGCAACCCCGGATT     | 52   | 61    |
| M121L-R | TATAATCCGGGGTTGCCAGGATAGCACCAT     | 50   | 62    |
| L174V-F | GCCTTAGATAGCGCTGTAAGTGGCCATTATG    | 50   | 61    |
| L174V-R | CCCCACATAATGGCCAGTACAGCGCTATC      | 55   | 61    |
| I177L-F | CGCTTTACTGGCCCTTATGTGGGGCGC        | 63   | 63    |
| I177L-R | CCCACATAAGGGCCAGTAAAGCGCTATC       | 54   | 61    |
| I177V-F | CGCTTTACTGGCCGTTATGTGGGGCGC        | 63   | 65    |
| I177V-R | CCCACATAACGGCCAGTAAAGCGCTATC       | 54   | 59    |
| T209L-F | GGAGTGCTCTGGCTCCAGTTATCGATGG       | 57   | 58    |
| T209L-R | CGATAACTGGAGCCAGAGCACTCCACTGGC     | 60   | 61    |
| I213V-F | GGCTCCAGTTGTCGATGGCTTAGTGACGG      | 59   | 63    |
| I213V-R | CTAAGCCATCGACAAGTGGAGCCGTAGC       | 57   | 61    |
| L216V-F | GGCTCCAGTTATCGATGGCGTAGTGACGG      | 59   | 62    |
| L216V-R | GATCAGATCCGTCACIACGCCATCGATAACTG   | 50   | 60    |
| A241T-F | GAGTAGTATCTCAACAATCATGGCGCAATGCAG  | 47   | 62    |
| A241T-R | GCGCCATGATGTGTGAGATACTACTCAGGG     | 52   | 63    |
| A241I-F | GAGTAGTATCTCAATAATCATGGCGCAATGCAG  | 44   | 59    |
| A241I-R | GCGCCATGATGTATGAGATACTACTCAGGG     | 48   | 58    |
| A241P-F | GAGTAGTATCTCAACAATCATGGCGCAATGCAG  | 50   | 61    |
| A241P-R | GCGCCATGATGTGGTGAGATACTACTCAGGG    | 55   | 64    |
| A241V-F | GAGTAGTATCTCAGTACATCATGGCGCAATGCAG | 44   | 59    |
| A241V-R | GCGCCATGATGTACTGAGATACTACTCAGGG    | 48   | 58    |
| A245S-F | CAGCACATCATGGCTCAATGCAGCATTTAC     | 47   | 61    |
| A245S-R | RCTGCATTGAGCCATGATGTGCTGAGATAC     | 48   | 60    |
| M121A-F | GGTGCTATCGCGCAACCCCGGATTATATTGG    | 56   | 60    |
| M121A-R | AATCCGGGGTTGCCCGCGATAGCACCATCTAA   | 55   | 59    |
| D171A-F | GTGCTAATGCCTTAGCTAGCGCTTTACTGG     | 50   | 58    |
| D171A-R | ATAATGGCCAGTAAAGCGCTAGCTAAGGCATTA  | 42   | 61    |
| L174A-F | CTTAGATAGCGCTGCACTGGCCATTATGTGGGGC | 56   | 61    |
| L174A-R | CCACATAATGGCCAGTGCAGCGCTATCTAAGG   | 53   | 58    |
| L175A-F | CTTAGATAGCGCTTTAGCGGCCATTATGTGGGGC | 53   | 59    |

|                     |                                                |    |    |
|---------------------|------------------------------------------------|----|----|
| L175A-R             | ACATAATGGC <u>CGC</u> TAAAGCGCTATCTAAGGCATTAGC | 46 | 59 |
| I177A-F             | CGCTTTACTGGCC <u>GCT</u> ATGTGGGGCGC           | 67 | 60 |
| I177A-R             | CCCCACAT <u>AGC</u> GGCCAGTAAAGCGCTATC         | 59 | 57 |
| M178A-F             | GGCCATT <u>GCG</u> TGGGGCGCTCTGTTTGG           | 67 | 61 |
| M178A-R             | GCGCCCCA <u>CGC</u> AATGGCCAGTAAAGCG           | 67 | 61 |
| T209A-F             | CCAGTGGAGTGCT <u>GCG</u> GCTCC                 | 71 | 61 |
| T209A-R             | CCATCGATAACTGGAGC <u>CGC</u> AGCACTCC          | 61 | 62 |
| V212A-F             | GGAGTGCTACGGCTCCA <u>GCT</u> ATCGATGG          | 61 | 62 |
| V212A-R             | RCCGTCCTAAGCCATCGAT <u>AGC</u> TGGAGCC         | 59 | 63 |
| I213A-F             | GGCTCCAGTT <u>GCC</u> GATGGCTTAGTGACGG         | 62 | 58 |
| I213A-R             | CCATC <u>GGC</u> AACTGGAGCCGTAGCACTCC          | 64 | 59 |
| L216A-F             | CGATGGC <u>GCA</u> GTGACGGATCTGATCAAACGTACAA   | 51 | 60 |
| L216A-R             | GATCAGATCCGTCAC <u>TGC</u> GCCATCGATAACTG      | 53 | 57 |
| M121L/I120M-F       | TTAGATGGTGCT <u>ATG</u> CTGGCAACCCCGGATT       | 52 | 64 |
| M121L/I120M-R       | TATAATCCGGGGTTGCCAG <u>CAT</u> AGCACCAT        | 50 | 60 |
| T209L/I213V-F       | GGCTCCAGTT <u>GTC</u> GATGGCTTAGTGACGG         | 59 | 64 |
| T209L/I213V-R       | CTAAGCCATC <u>GAC</u> AACTGGAGCCAGAGC          | 57 | 61 |
| T209L/V212A-F       | CTCTGGCTCCA <u>GCT</u> ATCGATGGCTTAGTGAC       | 55 | 60 |
| T209L/V212A-R       | CCATCGAT <u>AGC</u> TGGAGCCAGAGCACTCC          | 61 | 63 |
| T209L/V212G-F       | CTCTGGCTCCA <u>GGT</u> ATCGATGGCTTAGTGAC       | 55 | 63 |
| T209L/V212G-R       | CCATCGAT <u>ACC</u> TGGAGCCAGAGCACTCC          | 61 | 61 |
| V212A/I213V-F       | GGCTCCAGCT <u>GTC</u> GATGGCTTAGTGACGG         | 62 | 64 |
| V212A/I213V-R       | CTAAGCCATC <u>GAC</u> AGCTGGAGCCGTAGC          | 61 | 63 |
| V212A/L216V-F       | CGATGGC <u>CGTA</u> GTGACGGATCTGATCAAAC        | 52 | 60 |
| V212A/L216V-R       | GATCCGTCAC <u>TAC</u> GCCATCGATAGCTGG          | 57 | 60 |
| V212A/T209I-F       | CAGTGGAGTGCT <u>ATC</u> GCTCCAGCTATCGATGGC     | 58 | 61 |
| V212A/T209I-R       | CGATAGCTGGAGC <u>GAT</u> AGCACTCCACTGGCGGGC    | 65 | 67 |
| V212A/T209V-F       | CAGTGGAGTGCT <u>GTC</u> GCTCCAGCTATCGATGGC     | 61 | 64 |
| V212A/T209V-R       | CGATAGCTGGAGC <u>CAC</u> AGCACTCCACTGGCGGGC    | 68 | 68 |
| T209L/L216V/I177A-F | GCTTTACTGGCC <u>GCT</u> ATGTGGGGCGCTCTGTTTG    | 59 | 62 |
| T209L/L216V/I177A-R | CGCCCCACAT <u>AGC</u> GGCCAGTAAAGCGCTATCTAAG   | 57 | 62 |
| T209L/L216V/V212A-F | TCTGGCTCCA <u>GCT</u> ATCGATGGCGTAGTGAC        | 57 | 61 |
| T209L/L216V/V212A-R | CCATCGAT <u>AGC</u> TGGAGCCAGAGCACTC           | 59 | 61 |
| T209L/L216V/I213V-F | TGGCTCCAGTT <u>GTC</u> GATGGCGTAGTGACG         | 59 | 64 |
| T209L/L216V/I213V-R | TACGCCATC <u>GAC</u> AACTGGAGCCAGAGCAC         | 59 | 64 |



|                     |                                              |    |    |
|---------------------|----------------------------------------------|----|----|
| T209L/L216V/A241I-F | GAGTAGTATCTCA <u>ATA</u> CATCATGGCGCAATGCAG  | 44 | 59 |
| T209L/L216V/A241I-R | GCGCCATGATG <u>TAT</u> TGAGATACTACTCAGGG     | 48 | 58 |
| V212A/I177A/L216V-F | GCTATCGATGGC <u>GTA</u> GTGACGGATCTGATC      | 53 | 60 |
| V212A/I177A/L216V-R | TCCGTCAC <u>TAC</u> GCCATCGATAGCTGGAG        | 57 | 60 |
| V212A/I177A/T209L-F | AGTGGAGTGCT <u>CTG</u> GCTCCAGCTATCGATGG     | 58 | 62 |
| V212A/I177A/T209L-R | TAGCTGGAGC <u>CAG</u> AGCACTCCACTGGCG        | 64 | 61 |
| V212A/I177A/A241I-F | GAGTAGTATCTCA <u>ATA</u> CATCATGGCGCAATGCAG  | 44 | 59 |
| V212A/I177A/A241I-R | GCGCCATGATG <u>TAT</u> TGAGATACTACTCAGGG     | 48 | 58 |
| V212A/I213V/I177A-F | GCTTTACTGGCC <u>GCT</u> ATGTGGGGCGCTCTGTTTG  | 59 | 62 |
| V212A/I213V/I177A-R | CGCCCCACAT <u>AGC</u> GGCCAGTAAAGCGCTATCTAAG | 57 | 62 |
| V212A/I213V/L216V-F | GCTGTGATGGC <u>GTA</u> GTGACGGATCTGATC       | 57 | 62 |
| V212A/I213V/L216V-R | ATCCGTCAC <u>TAC</u> GCCATCGACAGCTGG         | 59 | 62 |
| V212A/I213V/T209L-F | AGTGGAGTGCT <u>CTG</u> GCTCCAGCTGTCTG        | 63 | 61 |
| V212A/I213V/T209L-R | AGCTGGAGC <u>CAG</u> AGCACTCCACTGGC          | 65 | 60 |
| V212A/I213V/A241I-F | GAGTAGTATCTCA <u>ATA</u> CATCATGGCGCAATGCAG  | 44 | 59 |
| V212A/I213V/A241I-R | GCGCCATGATG <u>TAT</u> TGAGATACTACTCAGGG     | 48 | 58 |

\*mutated bases were underlined
